# Supplementary material for: Tartrazine induces structural and functional aberrations and genotoxic effects in vivo
Source: PeerJ. 2017 Feb 23;5:e3041. doi: 10.7717/peerj.3041 (PMC5326541; doi:10.7717/peerj.3041)
Supplement: Data S2 [file peerj-05-3041-s002.xlsx]

## Sheet: Sheet2
						Uric acid(mg/dl)	Criat.(mg/dl)	urea(mg/dl)	ALP(U/ml)	ALT(U/ml)	AST(U/ml)
						0.5	0.63	33	66	28	63	Control 1
						0.8	0.2	41	41	37	51	Control 2
						0.7	0.31	35	38	18	48	Control 3
						0.41	0.29	42	50	40	39	Control 4
						0.53	0.42	40	40	24	41	Control 5
						0.9	0.91	42	70	65	95	Tatr. 1
						0.65	0.57	51	95	74	118	Tatr. 2
						0.74	0.64	48	110	90	86	Tatr. 3
						1.1	0.72	49	82	82	121	Tatrr. 4
						0.62	0.8	40	90	45	212	Tatr. 5

## Sheet: Sheet3
		T.ant(mM/l)	No(μM/l)	MDA(nM/ml)
		75	19	21	Control- 1
		66	11	17	Control 2
		59	20	14	Control 3
		21	48	36	Tatr. 1
		29	35	49	Tatr. 2
		35	40	55	Tatr. 3
